# Supplementary material for: Oral Curcumin With Piperine as Adjuvant Therapy for the Treatment of COVID-19: A Randomized Clinical Trial
Source: PubMed Central journal article supplement (PMC8193734; doi:10.3389/fphar.2021.669362), 2021-05-28
Supplement: Table1.pdf [file Table1.pdf]

**Supplementary Table 1: Mild subgroup: Statistical Analysis of Primary and Secondary outcomes.**

|                 |                                                                       | Mild       |              | Odds Ratio (95% CI) | Significance         |                 |
|-----------------|-----------------------------------------------------------------------|------------|--------------|---------------------|----------------------|-----------------|
| Parameters      |                                                                       | C3 Group   | Non C3 Group |                     |                      |                 |
| Sample Size (n) |                                                                       | 30         | 30           |                     |                      |                 |
| Sex             | Male                                                                  | 24 (80.0%) | 20 (66.7%)   |                     |                      |                 |
|                 | Female                                                                | 6 (20.0%)  | 10 (33.3%)   |                     |                      |                 |
| Risk Factor     | Age >60                                                               | 3 (10.0%)  | 9 (30.0%)    | 0.26 (0.06, 1.08)   | Not Significant      |                 |
|                 | Unilateral pneumonia                                                  | 0 (0.0%)   | 0 (0.0%)     |                     | Not Applicable       |                 |
|                 | Bilateral pneumonia                                                   | 0 (0.0%)   | 0 (0.0%)     |                     | Not Applicable       |                 |
|                 | Fever                                                                 | 16 (53.3%) | 12 (40.0%)   | 1.71 (0.62, 4.77)   | Not Significant      |                 |
|                 | Cold                                                                  | 9 (30.0%)  | 9 (30.0%)    | 1.00 (0.33, 3.02)   | Not Significant      |                 |
|                 | Cough                                                                 | 14 (46.7%) | 19 (63.3%)   | 0.51 (0.18, 1.42)   | Not Significant      |                 |
|                 | Sore throat                                                           | 5 (16.7%)  | 6 (20.0%)    | 0.80 (0.22, 2.97)   | Not Significant      |                 |
|                 | Sneezing                                                              | 0 (0.0%)   | 1 (3.3%)     |                     | Not Applicable       |                 |
|                 | Runny nose                                                            | 0 (0.0%)   | 2 (6.7%)     |                     | Not Applicable       |                 |
|                 | Shortness of breath                                                   | 7 (23.3%)  | 7 (23.3%)    | 1.00 (0.30, 3.31)   | Not Significant      |                 |
|                 | Headache                                                              | 3 (10.0%)  | 4 (13.3%)    | 0.72 (0.15, 3.54)   | Not Significant      |                 |
|                 | Diarrhoea                                                             | 1 (3.3%)   | 3 (10.0%)    | 0.31 (0.03, 3.17)   | Not Significant      |                 |
|                 | Myalgia                                                               | 4 (13.3%)  | 7 (23.3%)    | 0.51 (0.13, 1.95)   | Not Significant      |                 |
|                 | Fatigue                                                               | 2 (6.7%)   | 6 (20.0%)    | 0.29 (0.05, 1.55)   | Not Significant      |                 |
|                 | Loss of taste                                                         | 0 (0.0%)   | 0 (0.0%)     |                     | Not Applicable       |                 |
|                 | Symptoms<6d                                                           | 30 (100%)  | 27 (90.0%)   |                     | Not Applicable       |                 |
|                 | Symptoms>6d                                                           | 0 (0.0%)   | 3 (10.0%)    |                     | Not Applicable       |                 |
| PO2             | Patient showed red flag signs                                         | Yes        | 3 (10.0%)    | 7 (23.3%)           | 0.37 (0.08, 1.58)    | Not Significant |
|                 |                                                                       | No         | 27 (90.0%)   | 20 (66.7%)          | 4.50 (1.09, 18.50)   | Significant     |
| PO3             | Patient maintained SpO2 above 94% on room air throughout the stay     | Yes        | 28 (93.3%)   | 19 (63.3%)          | 8.11 (1.61, 40.77)   | Significant     |
|                 |                                                                       | No         | 2 (6.7%)     | 10 (33.3%)          | 0.14 (0.03, 0.72)    | Significant     |
| PO4             | Number of days patient could not maintain SpO2 above 94% on room air  | No         | 28 (93.3%)   | 21 (70.0%)          | 6.00 (1.17, 30.73)   | Significant     |
| PO5             | Patient required Oxygen therapy                                       | Yes        | 2 (6.7%)     | 10 (33.3%)          | 0.14 (0.03, 0.72)    | Significant     |
|                 |                                                                       | No         | 28 (93.3%)   | 21 (70.0%)          | 6.00 (1.17, 30.73)   | Significant     |
| PO7             | Patient required Oxygen therapy with high flow nasal cannula (HFNC)   | Yes        | 0 (0.0%)     | 1 (3.3%)            |                      | Not Applicable  |
|                 |                                                                       | No         | 30 (100%)    | 28 (93.3%)          |                      | Not Applicable  |
| PO8             | Patient failed to maintain SpO2 more than 88 % despite of oxygenation | Yes        | 0 (0.0%)     | 1 (3.3%)            |                      | Not Applicable  |
|                 |                                                                       | No         | 30 (100%)    | 29 (96.7%)          |                      | Not Applicable  |
| PO9             | intubation                                                            | Yes        | 0 (0.0%)     | 0 (0.0%)            |                      | Not Applicable  |
|                 |                                                                       | No         | 30 (100%)    | 30 (100%)           |                      | Not Applicable  |
|                 | mechanical ventilation (noninvasive / invasive)                       | MV-NI      | 0 (0.0%)     | 1 (3.3%)            |                      | Not Applicable  |
|                 |                                                                       | MV-I       | 0 (0.0%)     | 0 (0.0%)            |                      | Not Applicable  |
| PO10            | CRP rise                                                              |            | 3 (10.0%)    | 4 (13.3%)           | 0.72 (0.15, 3.54)    | Not Significant |
|                 | CRP decline                                                           |            | 0 (0.0%)     | 0 (0.0%)            |                      | Not Applicable  |
|                 | CRP approximately same                                                |            | 27 (90.0%)   | 15 (50.0%)          | 9.00 (2.24, 36.17)   | Significant     |
|                 | D-Dimer rise                                                          |            | 0 (0.0%)     | 0 (0.0%)            |                      | Not Applicable  |
|                 | D-Dimer decline                                                       |            | 0 (0.0%)     | 0 (0.0%)            |                      | Not Applicable  |
|                 | D-Dimer approximately same                                            |            | 29 (96.7%)   | 19 (63.3%)          | 16.79 (2.00, 140.90) | Significant     |
|                 | N/L>3.5                                                               |            | 4 (13.3%)    | 3 (10.0%)           | 1.38 (0.28, 6.80)    | Not Significant |
| N/L<3.5         |                                                                       | 25 (83.3%) | 15 (50.0%)   | 5.00 (1.51, 16.56)  | Significant          |                 |
| PO11            | Chest X Ray abnormalities                                             | Yes        | 3 (10.0%)    | 8 (26.7%)           | 0.31 (0.07, 1.29)    | Not Significant |
|                 |                                                                       | No         | 27 (90.0%)   | 22 (73.3%)          | 3.27 (0.77, 13.83)   | Not Significant |
| PO12            | Patient required COVID CARP protocol                                  | Yes        | 0 (0.0%)     | 7 (23.3%)           |                      | Not Applicable  |
|                 |                                                                       | No         | 30 (100%)    | 23 (76.7%)          |                      | Not Applicable  |
| PO13            | Patient required LMW Heparin                                          | Yes        | 2 (6.7%)     | 4 (13.3%)           | 0.46 (0.08, 2.75)    | Not Significant |
|                 |                                                                       | No         | 28 (93.3%)   | 26 (86.7%)          | 2.15 (0.36, 12.76)   | Not Significant |
| PO14            | Patient required Remdesivir                                           | Yes        | 1 (3.3%)     | 6 (20.0%)           | 0.14 (0.02, 1.23)    | Not Significant |
|                 |                                                                       | No         | 29 (96.7%)   | 24 (80.0%)          | 7.25 (0.82, 64.46)   | Not Significant |
| PO15            | Patient required cytokine storm treatment eg. Tocilizumab             | Yes        | 0 (0.0%)     | 0 (0.0%)            |                      | Not Applicable  |
|                 |                                                                       | No         | 30 (100%)    | 30 (100%)           |                      | Not Applicable  |
| SO2             | Duration of hospitalisation                                           | <10 days   | 30 (100%)    | 25 (83.3%)          |                      | Not Applicable  |
|                 |                                                                       | 10-14 day  | 0 (0.0%)     | 4 (13.3%)           |                      | Not Applicable  |
|                 |                                                                       | >14days    | 0 (0.0%)     | 1 (3.3%)            |                      | Not Applicable  |
| SO3             | Thromboembolic events                                                 | Yes        | 0 (0.0%)     | 1 (3.3%)            |                      | Not Applicable  |
|                 |                                                                       | No         | 30 (100%)    | 29 (96.7%)          |                      | Not Applicable  |
|                 | Pulmonary fibrosis                                                    | Yes        | 0 (0.0%)     | 2 (6.7%)            |                      | Not Applicable  |
|                 |                                                                       | No         | 30 (100%)    | 26 (86.7%)          |                      | Not Applicable  |
| SO4             | Death related to SARS CoV2 and causes of mortality                    | Yes        | 0 (0.0%)     | 1 (3.3%)            |                      | Not Applicable  |
|                 |                                                                       | No         | 30 (100%)    | 29 (96.7%)          |                      | Not Applicable  |
| ADR1            | Nausea, Vomiting, Abdominal discomfort                                | Yes        | 0 (0.0%)     | 0 (0.0%)            |                      | Not Applicable  |
|                 |                                                                       | No         | 30 (100%)    | 30 (100%)           |                      | Not Applicable  |
| ADR2            | Skin Rash                                                             | Yes        | 0 (0.0%)     | 0 (0.0%)            |                      | Not Applicable  |
|                 |                                                                       | No         | 30 (100%)    | 30 (100%)           |                      | Not Applicable  |
| ADR3            | Burning micturition                                                   | Yes        | 0 (0.0%)     | 0 (0.0%)            |                      | Not Applicable  |
|                 |                                                                       | No         | 30 (100%)    | 30 (100%)           |                      | Not Applicable  |
| ADR4            | Excessive bleeding                                                    | Yes        | 0 (0.0%)     | 0 (0.0%)            |                      | Not Applicable  |
|                 |                                                                       | No         | 30 (100%)    | 30 (100%)           |                      | Not Applicable  |

PO - Primary Outcome; SO - Secondary Outcome; ADR - Adverse drug reaction

If 95% confidence interval for odds ratio contains value 1, then the parameter is not significant at 5% level.
