# Supplementary material for: Oral Curcumin With Piperine as Adjuvant Therapy for the Treatment of COVID-19: A Randomized Clinical Trial
Source: PubMed Central journal article supplement (PMC8193734; doi:10.3389/fphar.2021.669362), 2021-05-28
Supplement: Table2.pdf [file Table2.pdf]

**Supplementary Table 2: Moderate subgroup: Statistical Analysis of Primary and Secondary outcomes.**

|                 |                                                                       | Moderate   |              | Odds Ratio (95% CI) | Significance         |                 |
|-----------------|-----------------------------------------------------------------------|------------|--------------|---------------------|----------------------|-----------------|
| Parameters      |                                                                       | C3 Group   | Non C3 Group |                     |                      |                 |
| Sample Size (n) |                                                                       | 25         | 25           |                     |                      |                 |
| Sex             | Male                                                                  | 14 (56.0%) | 23 (92.0%)   |                     |                      |                 |
|                 | Female                                                                | 11 (44.0%) | 2 (8.0%)     |                     |                      |                 |
| Risk Factor     | Age >60                                                               | 10 (40.0%) | 6 (24.0%)    | 2.11 (0.62, 7.13)   | Not Significant      |                 |
|                 | Unilateral pneumonia                                                  | 4 (16.0%)  | 1 (4.0%)     | 4.57 (0.47, 44.17)  | Not Significant      |                 |
|                 | Bilateral pneumonia                                                   | 20 (80.0%) | 24 (96.0%)   | 0.17 (0.02, 1.55)   | Not Significant      |                 |
|                 | Fever                                                                 | 20 (80.0%) | 17 (68.0%)   | 1.88 (0.52, 6.84)   | Not Significant      |                 |
|                 | Cold                                                                  | 11 (44.0%) | 8 (32.0%)    | 1.67 (0.53, 5.29)   | Not Significant      |                 |
|                 | Cough                                                                 | 18 (72.0%) | 16 (64.0%)   | 1.45 (0.44, 4.78)   | Not Significant      |                 |
|                 | Sore throat                                                           | 3 (12.0%)  | 1 (4.0%)     | 3.27 (0.32, 33.84)  | Not Significant      |                 |
|                 | Sneezing                                                              | 0 (0.0%)   | 0 (0.0%)     |                     | Not Applicable       |                 |
|                 | Runny nose                                                            | 0 (0.0%)   | 1 (4.0%)     |                     | Not Applicable       |                 |
|                 | Shortness of breath                                                   | 6 (24.0%)  | 15 (60.0%)   | 0.21 (0.06, 0.71)   | Significant          |                 |
|                 | Headache                                                              | 5 (20.0%)  | 1 (4.0%)     | 6.00 (0.65, 55.66)  | Not Significant      |                 |
|                 | Diarrhoea                                                             | 1 (4.0%)   | 1 (4.0%)     | 1.00 (0.06, 16.93)  | Not Significant      |                 |
|                 | Myalgia                                                               | 6 (24.0%)  | 2 (8.0%)     | 3.63 (0.66, 20.12)  | Not Significant      |                 |
|                 | Fatigue                                                               | 7 (28.0%)  | 2 (8.0%)     | 4.47 (0.83, 24.19)  | Not Significant      |                 |
|                 | Loss of taste                                                         | 1 (4.0%)   | 0 (0.0%)     |                     | Not Applicable       |                 |
|                 | Symptoms<6d                                                           | 22 (88.0%) | 21 (84.0%)   | 1.40 (0.28, 7.00)   | Not Significant      |                 |
|                 | Symptoms>6d                                                           | 3 (12.0%)  | 3 (12.0%)    | 1.00 (0.18, 5.51)   | Not Significant      |                 |
| PO2             | Patient showed red flag signs                                         | Yes        | 13 (52.0%)   | 25 (100.0%)         |                      | Not Applicable  |
|                 |                                                                       | No         | 13 (52.0%)   | 0 (0.0%)            |                      | Not Applicable  |
| PO3             | Patient maintained SpO2 above 94% on room air throughout the stay     | Yes        | 14 (56.0%)   | 2 (8.0%)            | 14.64 (2.82, 75.96)  | Significant     |
|                 |                                                                       | No         | 12 (48.0%)   | 23 (92.0%)          | 0.08 (0.02, 0.42)    | Significant     |
| PO4             | Number of days patient could not maintain SpO2 above 94% on room air  | No         | 5 (20.0%)    | 1 (4.0%)            | 6.00 (0.65, 55.66)   | Not Significant |
| PO5             | Patient required Oxygen therapy                                       | Yes        | 13 (52.0%)   | 25 (100.0%)         |                      | Not Applicable  |
|                 |                                                                       | No         | 12 (48.0%)   | 0 (0.0%)            |                      | Not Applicable  |
| PO7             | Patient required Oxygen therapy with high flow nasal cannula (HFNC)   | Yes        | 0 (0.0%)     | 9 (36.0%)           |                      | Not Applicable  |
|                 |                                                                       | No         | 25 (100.0%)  | 16 (64.0%)          |                      | Not Applicable  |
| PO8             | Patient failed to maintain SpO2 more than 88 % despite of oxygenation | Yes        | 0 (0.0%)     | 6 (24.0%)           |                      | Not Applicable  |
|                 |                                                                       | No         | 25 (100.0%)  | 19 (76.0%)          |                      | Not Applicable  |
| PO9             | intubation                                                            | Yes        | 0 (0.0%)     | 0 (0.0%)            |                      | Not Applicable  |
|                 |                                                                       | No         | 15 (60.0%)   | 17 (68.0%)          | 0.71 (0.22, 2.25)    | Not Significant |
|                 | mechanical ventilation (noninvasive / invasive)                       | MV-NI      | 0 (0.0%)     | 6 (24.0%)           |                      | Not Applicable  |
|                 |                                                                       | MV-I       | 0 (0.0%)     | 0 (0.0%)            |                      | Not Applicable  |
| PO10            | CRP rise                                                              |            | 14 (56.0%)   | 24 (96.0%)          | 0.05 (0.01, 0.46)    | Significant     |
|                 | CRP decline                                                           |            | 0 (0.0%)     | 0 (0.0%)            |                      | Not Applicable  |
|                 | CRP approximately same                                                |            | 6 (24.0%)    | 0 (0.0%)            |                      | Not Applicable  |
|                 | D-Dimer rise                                                          |            | 3 (12.0%)    | 6 (24.0%)           | 0.43 (0.09, 1.97)    | Not Significant |
|                 | D-Dimer decline                                                       |            | 0 (0.0%)     | 0 (0.0%)            |                      | Not Applicable  |
|                 | D-Dimer approximately same                                            |            | 7 (28.0%)    | 1 (4.0%)            | 9.33 (1.05, 82.78)   | Significant     |
|                 | N/L>3.5                                                               |            | 9 (36.0%)    | 11 (44.0%)          | 0.72 (0.23, 2.23)    | Not Significant |
| N/L<3.5         |                                                                       | 6 (24.0%)  | 6 (24.0%)    | 1.00 (0.27, 3.66)   | Not Significant      |                 |
| PO11            | Chest X Ray abnormalities                                             | Yes        | 24 (96.0%)   | 25 (100.0%)         |                      | Not Applicable  |
|                 |                                                                       | No         | 1 (4.0%)     | 0 (0.0%)            |                      | Not Applicable  |
| PO12            | Patient required COVID CARP protocol                                  | Yes        | 11 (44.0%)   | 22 (88.0%)          | 0.11 (0.03, 0.45)    | Significant     |
|                 |                                                                       | No         | 14 (56.0%)   | 3 (12.0%)           | 9.33 (2.21, 39.46)   | Significant     |
| PO13            | Patient required LMW Heparin                                          | Yes        | 14 (56.0%)   | 24 (96.0%)          | 0.05 (0.01, 0.46)    | Significant     |
|                 |                                                                       | No         | 11 (44.0%)   | 1 (4.0%)            | 18.86 (2.20, 161.99) | Significant     |
| PO14            | Patient required Remdesivir                                           | Yes        | 7 (28.0%)    | 22 (88.0%)          | 0.05 (0.01, 0.24)    | Significant     |
|                 |                                                                       | No         | 18 (72.0%)   | 3 (12.0%)           | 18.86 (4.25, 83.59)  | Significant     |
| PO15            | Patient required cytokine storm treatment eg. Tocilizumab             | Yes        | 0 (0.0%)     | 5 (20.0%)           |                      | Not Applicable  |
|                 |                                                                       | No         | 25 (100.0%)  | 20 (80.0%)          |                      | Not Applicable  |
| SO2             | Duration of hospitalisation                                           | <10 days   | 25 (100.0%)  | 11 (44.0%)          |                      | Not Applicable  |
|                 |                                                                       | 10-14 day  | 0 (0.0%)     | 10 (40.0%)          |                      | Not Applicable  |
|                 |                                                                       | >14days    | 0 (0.0%)     | 4 (16.0%)           |                      | Not Applicable  |
| SO3             | Thromboembolic events                                                 | Yes        | 0 (0.0%)     | 4 (16.0%)           |                      | Not Applicable  |
|                 |                                                                       | No         | 25 (100.0%)  | 21 (84.0%)          |                      | Not Applicable  |
|                 | Pulmonary fibrosis                                                    | Yes        | 0 (0.0%)     | 12 (48.0%)          |                      | Not Applicable  |
|                 |                                                                       | No         | 25 (100.0%)  | 13 (52.0%)          |                      | Not Applicable  |
| SO4             | Death related to SARS CoV2 and causes of mortality                    | Yes        | 0 (0.0%)     | 5 (20.0%)           |                      | Not Applicable  |
|                 |                                                                       | No         | 25 (100.0%)  | 20 (80.0%)          |                      | Not Applicable  |
| ADR1            | Nausea, Vomiting, Abdominal discomfort                                | Yes        | 5 (20.0%)    | 0 (0.0%)            |                      | Not Applicable  |
|                 |                                                                       | No         | 20 (80.0%)   | 25 (100.0%)         |                      | Not Applicable  |
| ADR2            | Skin Rash                                                             | Yes        | 0 (0.0%)     | 0 (0.0%)            |                      | Not Applicable  |
|                 |                                                                       | No         | 25 (100.0%)  | 25 (100.0%)         |                      | Not Applicable  |
| ADR3            | Burning micturition                                                   | Yes        | 2 (8.0%)     | 0 (0.0%)            |                      | Not Applicable  |
|                 |                                                                       | No         | 23 (92.0%)   | 25 (100.0%)         |                      | Not Applicable  |
| ADR4            | Excessive bleeding                                                    | Yes        | 0 (0.0%)     | 0 (0.0%)            |                      | Not Applicable  |
|                 |                                                                       | No         | 25 (100.0%)  | 25 (100.0%)         |                      | Not Applicable  |

PO - Primary Outcome; SO - Secondary Outcome; ADR - Adverse drug reaction

If 95% confidence interval for odds ratio contains value 1, then the parameter is not significant at 5% level.
