# Supplementary material for: Oral Curcumin With Piperine as Adjuvant Therapy for the Treatment of COVID-19: A Randomized Clinical Trial
Source: PubMed Central journal article supplement (PMC8193734; doi:10.3389/fphar.2021.669362), 2021-05-28
Supplement: Table3.pdf [file Table3.pdf]

**Supplementary Table 3: Severe subgroup: Statistical Analysis of Primary and Secondary outcomes.**

|                 |                                                                       | Severe      |              |                     |                       |                 |
|-----------------|-----------------------------------------------------------------------|-------------|--------------|---------------------|-----------------------|-----------------|
| Parameters      |                                                                       | C3 Group    | Non C3 Group | Odds Ratio (95% CI) | Significance          |                 |
| Sample Size (n) |                                                                       | 15          | 15           |                     |                       |                 |
| Sex             | Male                                                                  | 7 (46.7%)   | 11 (73.3%)   |                     |                       |                 |
|                 | Female                                                                | 8 (53.3%)   | 4 (26.7%)    |                     |                       |                 |
| Risk Factor     | Age >60                                                               | 7 (46.7%)   | 5 (33.3%)    | 1.75 (0.40, 7.66)   | Not Significant       |                 |
|                 | Unilateral pneumonia                                                  | 0 (0.0%)    | 1 (6.7%)     | Not Applicable      |                       |                 |
|                 | Bilateral pneumonia                                                   | 15 (100.0%) | 14 (93.3%)   | Not Applicable      |                       |                 |
|                 | Fever                                                                 | 12 (80.0%)  | 9 (60.0%)    | 2.67 (0.52, 13.66)  | Not Significant       |                 |
|                 | Cold                                                                  | 5 (33.3%)   | 3 (20.0%)    | 2.00 (0.38, 10.51)  | Not Significant       |                 |
|                 | Cough                                                                 | 11 (73.3%)  | 11 (73.3%)   | 1.00 (0.20, 5.05)   | Not Significant       |                 |
|                 | Sore throat                                                           | 6 (40.0%)   | 1 (6.7%)     | 9.33 (0.96, 90.94)  | Not Significant       |                 |
|                 | Sneezing                                                              | 1 (6.7%)    | 0 (0.0%)     | Not Applicable      |                       |                 |
|                 | Runny nose                                                            | 1 (6.7%)    | 0 (0.0%)     | Not Applicable      |                       |                 |
|                 | Shortness of breath                                                   | 6 (40.0%)   | 12 (80.0%)   | 0.17 (0.03, 0.85)   | Significant           |                 |
|                 | Headache                                                              | 0 (0.0%)    | 1 (6.7%)     | Not Applicable      |                       |                 |
|                 | Diarrhoea                                                             | 1 (6.7%)    | 0 (0.0%)     | Not Applicable      |                       |                 |
|                 | Myalgia                                                               | 3 (20.0%)   | 5 (33.3%)    | 0.50 (0.10, 2.63)   | Not Significant       |                 |
|                 | Fatigue                                                               | 3 (20.0%)   | 2 (13.3%)    | 1.63 (0.23, 11.46)  | Not Significant       |                 |
|                 | Loss of taste                                                         | 0 (0.0%)    | 0 (0.0%)     | Not Applicable      |                       |                 |
|                 | Symptoms<6d                                                           | 11 (73.3%)  | 11 (73.3%)   | 1.00 (0.20, 5.05)   | Not Significant       |                 |
|                 | Symptoms>6d                                                           | 3 (20.0%)   | 4 (26.7%)    | 0.69 (0.12, 3.79)   | Not Significant       |                 |
| PO2             | Patient showed red flag signs                                         | Yes         | 15 (100.0%)  | 15 (100.0%)         | Not Applicable        |                 |
|                 |                                                                       | No          | 0 (0.0%)     | 0 (0.0%)            | Not Applicable        |                 |
| PO3             | Patient maintained SpO2 above 94% on room air throughout the stay     | Yes         | 0 (0.0%)     | 0 (0.0%)            | Not Applicable        |                 |
|                 |                                                                       | No          | 14 (93.3%)   | 15 (100.0%)         | Not Applicable        |                 |
| PO4             | Number of days patient could not maintain SpO2 above 94% on room air  | No          | 0 (0.0%)     | 15 (100.0%)         | Not Applicable        |                 |
| PO5             | Patient required Oxygen therapy                                       | Yes         | 13 (86.7%)   | 15 (100.0%)         | Not Applicable        |                 |
|                 |                                                                       | No          | 2 (13.3%)    | 0 (0.0%)            | Not Applicable        |                 |
| PO7             | Patient required Oxygen therapy with high flow nasal cannula (HFNC)   | Yes         | 2 (13.3%)    | 11 (73.3%)          | 0.06 (0.01, 0.37)     | Significant     |
|                 |                                                                       | No          | 12 (80.0%)   | 4 (26.7%)           | 11.00 (2.00, 60.57)   | Significant     |
| PO8             | Patient failed to maintain SpO2 more than 88 % despite of oxygenation | Yes         | 3 (20.0%)    | 8 (53.3%)           | 0.22 (0.04, 1.11)     | Not Significant |
|                 |                                                                       | No          | 12 (80.0%)   | 7 (46.7%)           | 4.57 (0.90, 23.14)    | Not Significant |
| PO9             | intubation                                                            | Yes         | 1 (6.7%)     | 1 (6.7%)            | 1.00 (0.06, 17.62)    | Not Significant |
|                 |                                                                       | No          | 9 (60.0%)    | 11 (73.3%)          | 0.55 (0.12, 2.55)     | Not Significant |
|                 | mechanical ventilation (noninvasive / invasive)                       | MV-NI       | 1 (6.7%)     | 6 (40.0%)           | 0.11 (0.01, 1.04)     | Not Significant |
|                 |                                                                       | MV-I        | 1 (6.7%)     | 0 (0.0%)            | Not Applicable        |                 |
| PO10            | CRP rise                                                              |             | 14 (93.3%)   | 15 (100.0%)         | Not Applicable        |                 |
|                 | CRP decline                                                           |             | 0 (0.0%)     | 0 (0.0%)            | Not Applicable        |                 |
|                 | CRP approximately same                                                |             | 1 (6.7%)     | 0 (0.0%)            | Not Applicable        |                 |
|                 | D-Dimer rise                                                          |             | 12 (80.0%)   | 15 (100.0%)         | Not Applicable        |                 |
|                 | D-Dimer decline                                                       |             | 0 (0.0%)     | 0 (0.0%)            | Not Applicable        |                 |
|                 | D-Dimer approximately same                                            |             | 1 (6.7%)     | 0 (0.0%)            | Not Applicable        |                 |
|                 | N/L>3.5                                                               |             | 9 (60.7%)    | 9 (60.0%)           | 1.00 (0.23, 4.31)     | Not Significant |
| N/L<3.5         |                                                                       | 4 (26.7%)   | 5 (33.3%)    | 0.73 (0.15, 3.49)   | Not Significant       |                 |
| PO11            | Chest X Ray abnormalities                                             | Yes         | 15 (100.0%)  | 15 (100.0%)         | Not Applicable        |                 |
|                 |                                                                       | No          | 0 (0.0%)     | 0 (0.0%)            | Not Applicable        |                 |
| PO12            | Patient required COVID CARP protocol                                  | Yes         | 13 (86.7%)   | 14 (93.3%)          | 0.46 (0.04, 5.75)     | Not Significant |
|                 |                                                                       | No          | 2 (13.3%)    | 1 (6.7%)            | 2.15 (0.17, 26.67)    | Not Significant |
| PO13            | Patient required LMW Heparin                                          | Yes         | 12 (80.0%)   | 13 (86.7%)          | 0.62 (0.09, 4.34)     | Not Significant |
|                 |                                                                       | No          | 3 (20.0%)    | 2 (13.3%)           | 1.63 (0.23, 11.46)    | Not Significant |
| PO14            | Patient required Remdesivir                                           | Yes         | 13 (86.7%)   | 15 (100.0%)         | Not Applicable        |                 |
|                 |                                                                       | No          | 2 (13.3%)    | 0 (0.0%)            | Not Applicable        |                 |
| PO15            | Patient required cytokine storm treatment eg. Tocilizumab             | Yes         | 2 (13.3%)    | 4 (26.7%)           | 0.42 (0.06, 2.77)     | Not Significant |
|                 |                                                                       | No          | 13 (86.7%)   | 11 (73.3%)          | 2.36 (0.36, 15.46)    | Not Significant |
| SO2             | Duration of hospitalisation                                           | <10 days    | 12 (80.0%)   | 5 (33.3%)           | 8.00 (1.52, 42.04)    | Significant     |
|                 |                                                                       | 10-14 day   | 2 (13.3%)    | 4 (26.7%)           | 0.42 (0.06, 2.77)     | Not Significant |
|                 |                                                                       | >14days     | 1 (6.7%)     | 6 (40.0%)           | 0.11 (0.01, 1.04)     | Not Significant |
| SO3             | Thromboembolic events                                                 | Yes         | 0 (0.0%)     | 2 (13.3%)           | Not Applicable        |                 |
|                 |                                                                       | No          | 14 (93.3%)   | 13 (86.7%)          | 2.15 (0.17, 26.67)    | Not Significant |
| SO4             | Pulmonary fibrosis                                                    | Yes         | 2 (13.3%)    | 14 (93.3%)          | 0.01 (0.00, 0.14)     | Significant     |
|                 |                                                                       | No          | 13 (86.7%)   | 1 (6.7%)            | 91.00 (7.35, 1126.95) | Significant     |
| SO4             | Death related to SARS CoV2 and causes of mortality                    | Yes         | 2 (13.3%)    | 5 (33.3%)           | 0.31 (0.05, 1.93)     | Not Significant |
|                 |                                                                       | No          | 13 (86.7%)   | 8 (53.3%)           | 5.69 (0.94, 34.46)    | Not Significant |
| ADR1            | Nausea, Vomiting, Abdominal discomfort                                | Yes         | 0 (0.0%)     | 0 (0.0%)            | Not Applicable        |                 |
|                 |                                                                       | No          | 15 (100.0%)  | 15 (100.0%)         | Not Applicable        |                 |
| ADR2            | Skin Rash                                                             | Yes         | 0 (0.0%)     | 0 (0.0%)            | Not Applicable        |                 |
|                 |                                                                       | No          | 15 (100.0%)  | 15 (100.0%)         | Not Applicable        |                 |
| ADR3            | Burning micturition                                                   | Yes         | 1 (6.7%)     | 0 (0.0%)            | Not Applicable        |                 |
|                 |                                                                       | No          | 14 (93.3%)   | 15 (100.0%)         | Not Applicable        |                 |
| ADR4            | Excessive bleeding                                                    | Yes         | 0 (0.0%)     | 0 (0.0%)            | Not Applicable        |                 |
|                 |                                                                       | No          | 15 (100.0%)  | 15 (100.0%)         | Not Applicable        |                 |

PO - Primary Outcome; SO - Secondary Outcome; ADR - Adverse drug reaction

If 95% confidence interval for odds ratio contains value 1, then the parameter is not significant at 5% level.
